# Supplementary material for: Operational Implications and Risk Assessment of COVID-19 in Dental Practices
Source: MDPI journal article supplement (doi:10.3390/ijerph182212244), 2021-11-22
Supplement: s1 [file s1]

## Operational Implications and Risk Assessment of COVID-19 in Dental Practices

We invite you to fill this survey questionnaire for our study and thank you in advance for your participation.

Please indicate your consent: I have read the invitation letter and I have understood the nature of this proposed study. I Consent to participate in the study. I understand that my participation in this study will not lead to any financial benefits.

☐ Yes

☐ No

☐ Other

|                                           |  |
|-------------------------------------------|--|
| <b>Patients Bio-data</b>                  |  |
| <b>Age</b>                                |  |
| <b>Gender</b>                             |  |
| <b>Occupation</b>                         |  |
| <b>Patient M.R Number (if applicable)</b> |  |

## Dear patients,

We need your feedback on what we can do to serve you better

| <b>Questionnaire items</b>                                                                                            | <b>Yes</b> | <b>No</b> |
|-----------------------------------------------------------------------------------------------------------------------|------------|-----------|
| Did any restrictions placed by clinic's security regarding to wear a face mask and to limit the number of attendants? |            |           |
| Did you receive any preventive measures at clinic entrance e.g., hand hygiene?                                        |            |           |
| Upon arrival, did you feel comfortable with the environment?                                                          |            |           |
| Were you seated accordingly with proper distancing?                                                                   |            |           |
| Did it take long to wait for your appointment?                                                                        |            |           |
| Did you have any dental emergency?                                                                                    |            |           |
| Was thermal scanning done before you entered the clinic?                                                              |            |           |
| Did the dentist take any medical history before starting the procedure?                                               |            |           |
| When you entered the procedure room was the dentist wearing proper personal protective hygiene (PPE)                  |            |           |
| Was the dental assistant wearing proper PPE as well?                                                                  |            |           |
| Were any PPE provided for your safety?                                                                                |            |           |

|                                                                                        |  |  |
|----------------------------------------------------------------------------------------|--|--|
| How was the aerosol procedure performed, were the water droplets spreading in the air? |  |  |
| Did the dentist guide the importance of proper hand hygiene?                           |  |  |
| Were proper infection control measures followed in the waiting area?                   |  |  |
| Are you satisfied with the services being provided to you?                             |  |  |

**Thank you.**
