# Supplementary material for: Operational Implications and Risk Assessment of COVID-19 in Dental Practices
Source: MDPI journal article supplement (doi:10.3390/ijerph182212244), 2021-11-22
Supplement: s1 [file s1]

# Operational Implications and Risk Assessment of COVID-19 in Dental Practices

We invite you to fill this survey questionnaire for our study and thank you in advance for your participation.

Please indicate your consent: I have read the invitation letter and I have understood the nature of this proposed study. I Consent to participate in the study. I understand that my participation in this study will not lead to any financial benefits.

☐ Yes

☐ No

☐ Other

## Demographic data

|                      |    |            |            |
|----------------------|----|------------|------------|
| <b>Gender</b>        |    |            |            |
| <b>Age</b>           |    |            |            |
| <b>Experience</b>    |    |            |            |
| <b>Qualification</b> | GD | Specialist | Consultant |

|  |            |           |
|--|------------|-----------|
|  | <b>Yes</b> | <b>No</b> |
|--|------------|-----------|

|                                     |  |  |
|-------------------------------------|--|--|
| <b>Public sector practitioner</b>   |  |  |
| <b>Private section practitioner</b> |  |  |

|                  |                |          |
|------------------|----------------|----------|
| <b>Works in:</b> | Private clinic | Hospital |
|------------------|----------------|----------|

## Financial impact

|                                                                                                                |            |           |
|----------------------------------------------------------------------------------------------------------------|------------|-----------|
|                                                                                                                | <b>Yes</b> | <b>No</b> |
| <b>After COVID-19 do you think we need to plan our finances better for the long term?</b>                      |            |           |
| <b>Do you think working along with the associates will help distribute the fixed costs more appropriately?</b> |            |           |
| <b>Do we need to invest more to attract patients?</b>                                                          |            |           |
| <b>Do we need to invest further so that the patient feels safer?</b>                                           |            |           |

## Psychological impact

|                                                                                                                   | Yes | No |
|-------------------------------------------------------------------------------------------------------------------|-----|----|
| Do negativity, stress, unhealthy diet & sleep pattern effect disease pattern                                      |     |    |
| Symptoms of post-traumatic stress disorder (PSTD) have been positively associated with the duration of quarantine |     |    |

## Patient's Satisfaction

|                                                                                                                   | Yes | No |
|-------------------------------------------------------------------------------------------------------------------|-----|----|
| Should all patients with pre-booked appointments be contacted and advised to avoid attending if non-urgent cases. |     |    |
| Will you accept urgent cases during lockdown?                                                                     |     |    |
| Do you agree that a patient should be accompanied by only one person                                              |     |    |
| Do you agree that a patient should be accompanied by only one person                                              |     |    |
| When compiling patient notes, should history of the symptoms be noted                                             |     |    |
| Should a additional section be included for the COVID-19 safety checklist?                                        |     |    |

# Hygiene

|                                                                                                          | Yes | No |
|----------------------------------------------------------------------------------------------------------|-----|----|
| Would you advise immune-compromised patients to use electronic toothbrush?                               |     |    |
| Should patients be provided with advice regarding ongoing personal hygiene as a preventative measure?    |     |    |
| Patient provided with appropriate after-care instructions to avoid follow-up appointments where possible |     |    |
| Should non-disposable toothbrush be cleaned with anti-microbial agent like Chlorhexidine                 |     |    |
| Should a 2% hydrogen peroxide mouthwash be used prior to procedure                                       |     |    |
| Regular cleaning of touched surfaces                                                                     |     |    |
| Do mouth wash or dental floss help in the prevention of virus spread?                                    |     |    |
| Use of full PPE or surgical gown, respirator, face shield                                                |     |    |
| Cleaning of floors 5 minutes after patient leave with water and 1% sodium hypochlorite                   |     |    |
| Disposables should be double wrapped                                                                     |     |    |

# Patient Management

|                                                                                               | Yes | No |
|-----------------------------------------------------------------------------------------------|-----|----|
| When entering the hospital, patients and anyone accompanying them should wear a face mask.    |     |    |
| Ask about the presence of fever or other symptoms consistent with COVID-19                    |     |    |
| Take the patient's temperature                                                                |     |    |
| Triage all patients in need of dental care to reduce patients wait times in the waiting area. |     |    |

# Lockdown in COVID-19 pandemic

|                                                          | Yes | No |
|----------------------------------------------------------|-----|----|
| Are your patients mentally effected after lock down      |     |    |
| Have you practiced or learnt anything after the pandemic |     |    |
| Do you agree of dental clinics closure during lockdown   |     |    |

# Your Perspective

|                                                                                                                           | Yes | No |
|---------------------------------------------------------------------------------------------------------------------------|-----|----|
| Telehealth / Telemedicine                                                                                                 |     |    |
| Change in mindset for professional and scientific approach.                                                               |     |    |
| Do you think wearing a respirator causes hindrance in effective communication between you and the patient?                |     |    |
| Avoid intra oral X-ray                                                                                                    |     |    |
| A tooth is extensively carious go for extraction                                                                          |     |    |
| Rubber dam (non-latex) for RCT                                                                                            |     |    |
| Aerosol suction while using high speed hand piece                                                                         |     |    |
| Manual scaling verses ultrasonic scaling                                                                                  |     |    |
| Change of face mask after every patient                                                                                   |     |    |
| Use of air conditioner along with open windows for ventilation                                                            |     |    |
| Use of anti-retraction hand piece                                                                                         |     |    |
| Do we pass the cost of increased spending on safety equipment e.g., PPEs to the patients / patient's insurance companies? |     |    |
| Is mobile dentistry a competitive advantage                                                                               |     |    |

# Practicing Dentistry Post-COVID-19

|                                                                | Yes | No |
|----------------------------------------------------------------|-----|----|
| Is mobile dentistry a competitive advantage                    |     |    |
| Will there be changes in professional and profitable practice. |     |    |
| Will there be a change of scenario over the next 5 years       |     |    |

Thank you.
